# Supplementary material for: A Multiplexed, Next Generation Sequencing Platform for High-Throughput Detection of SARS-CoV-2
Source: Research Square preprint supplement (doi:10.21203/rs.3.rs-89445/v1), 2020-10-14
Supplement: Supplementary file 1 [file 2306d583c9712922556c528c.pdf]

**A Multiplexed, Next Generation Sequencing Platform for High-Throughput**

**Detection of SARS-CoV-2**

Marie-Ming Aynaud<sup>1\*\*</sup>, J. Javier Hernandez<sup>1,3\*\*</sup>, Seda Barutcu<sup>1\*\*</sup>, Ulrich Braunschweig<sup>3,4</sup>,  
Kin Chan<sup>1</sup>, Joel D. Pearson<sup>1</sup>, Daniel Trcka<sup>1</sup>, Suzanna L. Prosser<sup>1</sup>, Jaeyoun Kim<sup>1</sup>, Miriam  
Barrios-Rodiles<sup>1</sup>, Mark Jen<sup>1</sup>, Siyuan Song<sup>4,5</sup>, Jess Shen<sup>1</sup>, Christine Bruce<sup>2</sup>, Bryn Hazlett<sup>2</sup>,  
Susan Poutanen<sup>2</sup>, Liliana Attisano<sup>4,5</sup>, Rod Bremner<sup>1</sup>, Benjamin J. Blencowe<sup>3,4</sup>, Tony  
Mazzulli<sup>2</sup>, Hong Han<sup>3,4</sup>, Laurence Pelletier<sup>1,3\*</sup>, Jeffrey L. Wrana<sup>1,3\*</sup>.

**Extended data Figures**

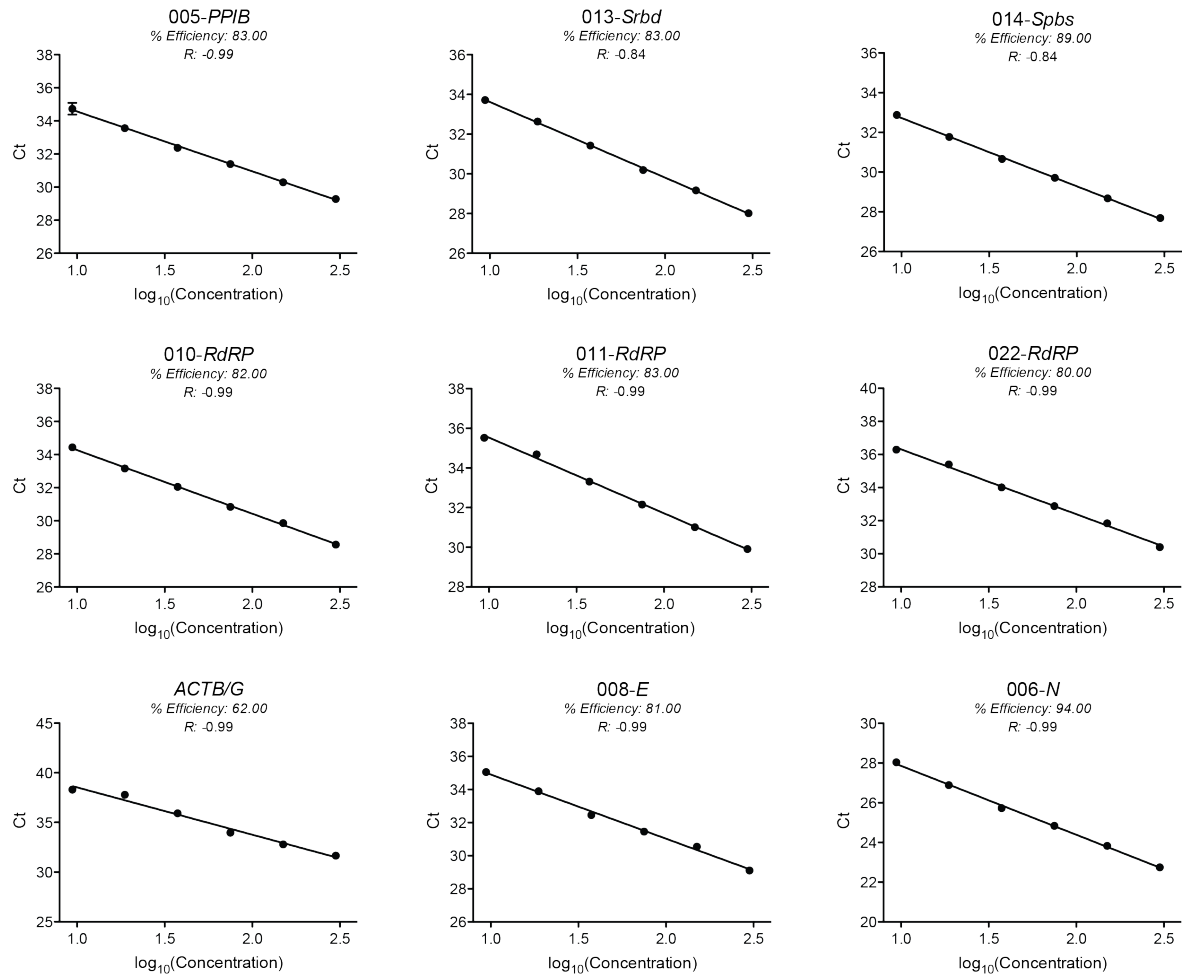

### Extended data Fig. 1

Extended data Fig. 1: Efficiency of multiplex primers. Standard curve of Ct values (Y-axis) and log<sub>10</sub>(Concentration) (X-axis) of 6 limited dilutions of SARS-CoV-2<sup>high</sup> sample (LTRI-18) for 9 pairs of primers (see Supplementary Table S1). Each condition was tested

- 16 in duplicate. Means are plotted for each point. The percent efficiency and the correlation
- 17 (r) are calculated for each pair of primers after linear regression.

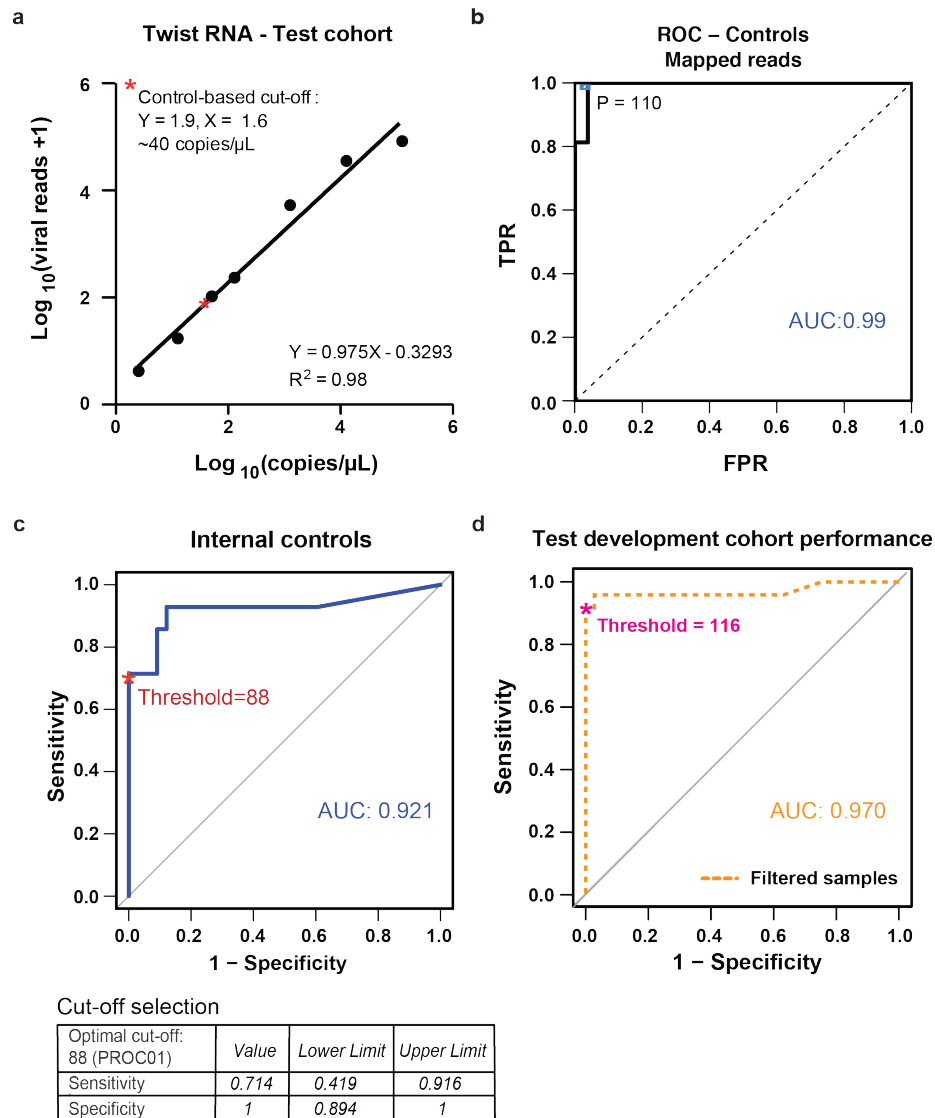

**Extended data Fig. 2**

**Extended data Fig. 2: Using embedded controls as a training set for a control-based PR and ROC classifier.** **a**, Total viral read counts are plotted against estimated viral copies (copies/ $\mu\text{L}$ ) obtained using synthetic Twist SARS-CoV-2 RNA with statistics indicated. The cutoff defined by PROC analysis (see panel **c**) is marked with a red

23 asterisk. **b**, Thresholding sample quality. coPR analysis on control samples: ROC of  
24 control samples for accurate detection of mapped reads are plotted. The optimal precision  
25 and recall read cut-off associated ( $P = 110$ ) with the highest F1 (0.97) score, and AUC  
26 (area under the curve) is indicated on the ROC plot. **c**, Threshold for classification of  
27 positives in the test cohort. Total viral reads of negative (H2O and HEK293T) and positive  
28 (Twist dilutions) samples are used to calculate optimum cut-off by PROC and the defined  
29 threshold ( $P = 88$ ) is plotted on the ROC curve. Values of sensitivity, and specificity at  
30 this cut-off are indicated (below). **d**, Performance of C19-SPAR-Seq. ROC analysis on  
31 patient samples that passed RNA-QC threshold was performed using clinical diagnostic  
32 results (Seegene Allplex qRT-PCR assay, **Supplementary Table 3**) and total viral reads  
33 for patient samples ( $n = 112$ ). AUC is indicated on the graph.

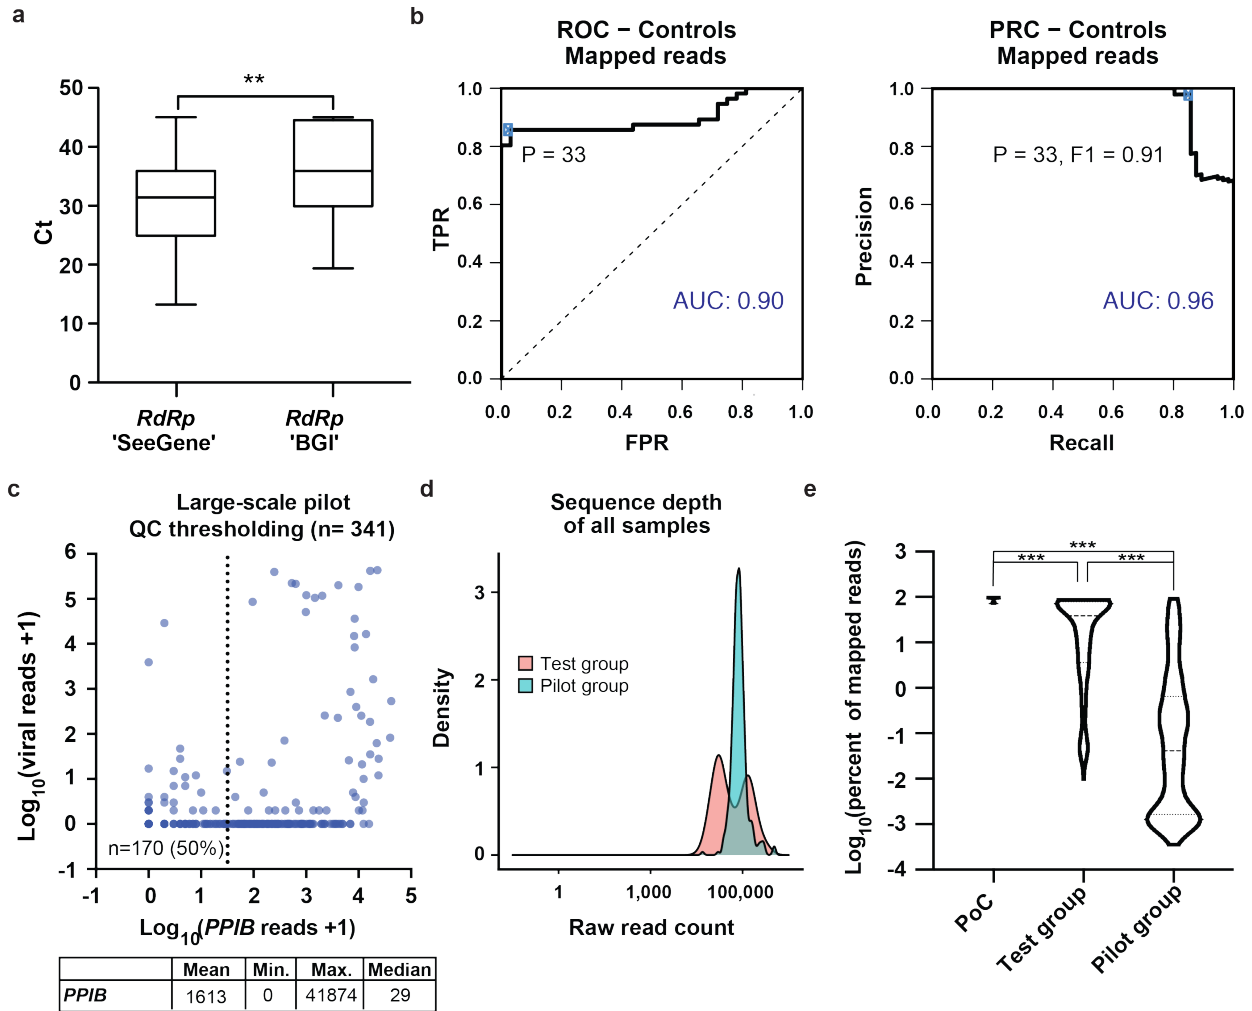

Extended data Fig. 3

**Extended data Fig. 3: Quality metrics assignment for the pilot cohort.** **a**, Comparison of Ct (*RdRP*) values in 'SeeGene' *versus* 'BGI' tests of the positive archival samples. **b**, coPR analysis on control samples. ROC and PRC of control samples are plotted and the optimal precision and recall cut-off ( $P = 33$ ) associated with the highest F1 score (0.91)

39 was calculated, as indicated in the PRC plot. **c**, coPR thresholding of the pilot cohort. Plot  
40 of total viral reads +1 (Y-axis) *versus* *PPIB* reads +1 (X-axis) of 341 patient samples in a  
41 pilot cohort (see Methods) is shown with the threshold (*PPIB* read counts > 33) to filter  
42 low-input samples marked. 170/341 (50%) samples were inconclusive (upper panel).  
43 Mean, minimum, maximum, and median values of *PPIB* and total viral read counts are  
44 indicated in the table (lower panel). **d**, Sequencing depth of test development and pilot  
45 cohort. Distribution density of raw read counts for the test development (pink) and pilot  
46 (turquoise) cohorts are shown. **e**, Read mapping percentages. Comparison of overall read  
47 mapping percentages between the PoC (**Fig. 1**), test (**Fig. 2**) and pilot cohort (n = 341).  
48 One way ANOVA - Tukey's multiple comparison test (\*\*\*\*:  $p < 0.0001$ ).

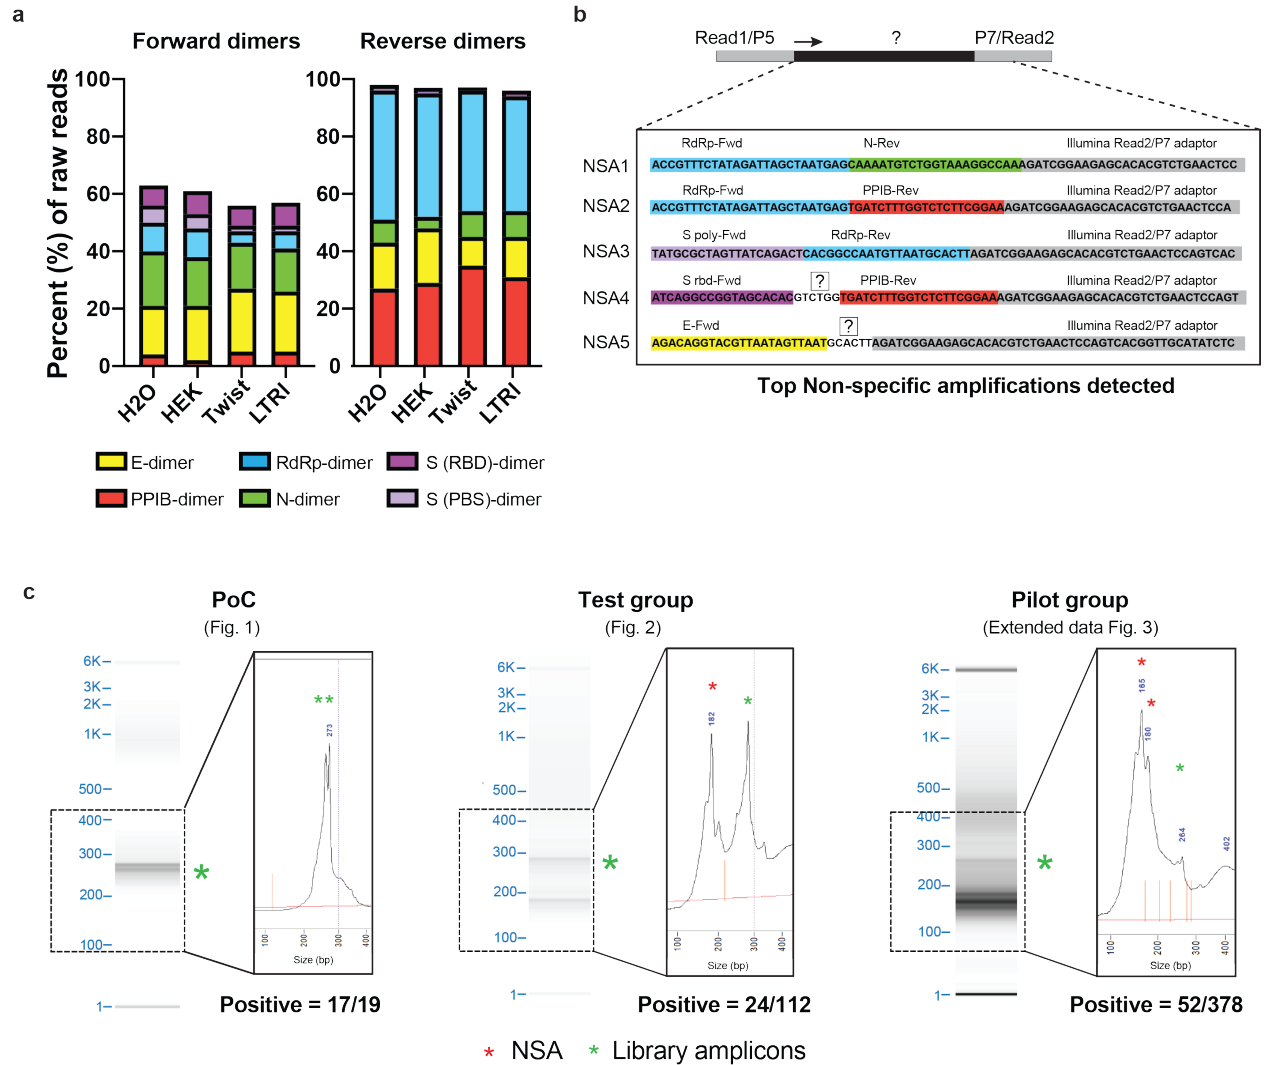

Extended data Fig. 4

**Extended data Fig. 4: Non-specific amplification (NSA) in pilot cohort.** **a**, Analysis of NSAs in the pilot cohort. NSAs contaminating the C19-SPAR-Seq library were quantified and percentage of reads mapping to the indicated forward and reverse primers are plotted. **b**, Schematic examples and sequences of the top 5 NSAs are shown. **c**,



54 Comparison of fragment analyzer profile of the PoC, test development, and pilot cohort  
55 libraries after 0.8X SPRI bead purification. Fragment separation (DNA gel) and blow up  
56 view of the product abundance (electropherogram) are shown. Expected library  
57 amplicons (green stars) and non-specific amplicons (red stars).

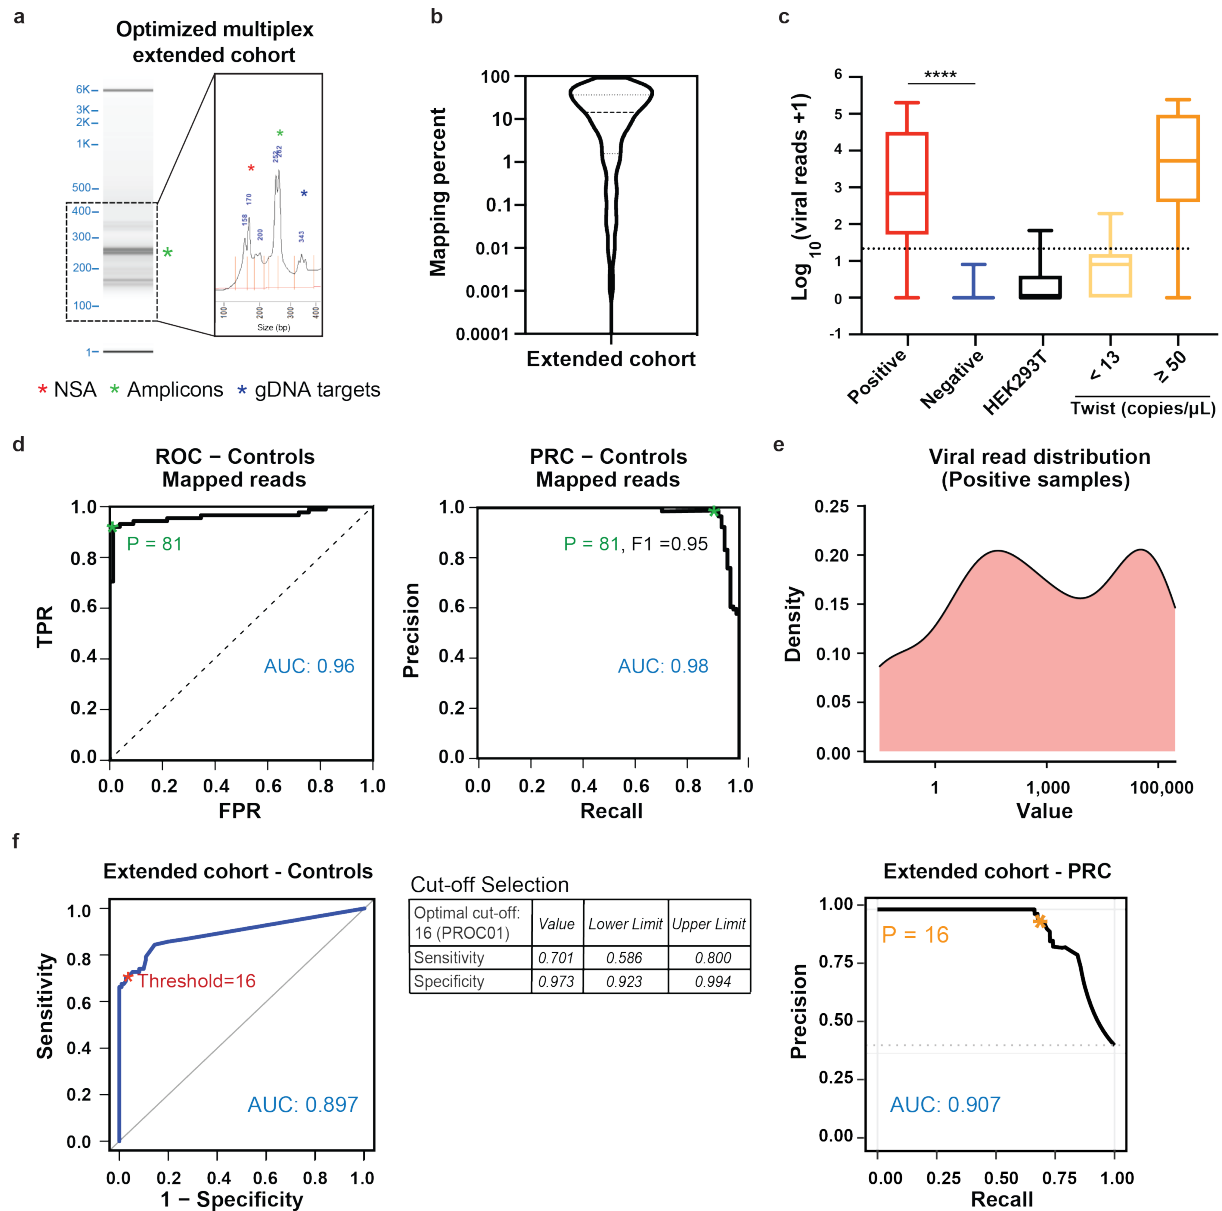

Extended data Fig. 5

**Extended data Fig. 5: Suppressing non-specific amplicons and quality metrics assignment for the extended cohort.** a, Fragment analyzer profile of the extended cohort library using an optimized multiplex primer set targeting *ACTB/G*, *Spoly*, *Srd*, and *RdRP*. Fragment separation (DNA gel) and blow up view of the product abundance

63 (electropherogram) is shown. **b**, Mapping percentage of the extended cohort. **c**, Overall  
64 distribution of total viral reads in the indicated positive samples (n = 98, red), negative  
65 samples (n = 444, blue), HEK293T (n = 21, black), synthetic SARS-CoV-2-RNA (< 13.2  
66 copies/μL, n = 6, yellow), and synthetic SARS-CoV-2-RNA (≥ 50 copies/μL, n = 30,  
67 orange) are plotted. Unpaired *t*-test of negative *versus* positive samples (\*\*\*\*:  $p < 0.0001$ ).  
68 **d**, coPR thresholding of sample quality and classification in the extended cohort. coPR  
69 analysis on control samples for sample quality yielded an optimal precision and recall  
70 read cut-off (P = 81) as indicated. **e**, Distribution of  $\log_{10}$  total reads +1 of the positive (n  
71 = 98) samples. **f**, Threshold for classification of the extended cohort. ROC on control  
72 samples (HEK293T and synthetic SARS-CoV-2 RNA control) was assessed to identify  
73 an optimal cut-off (P = 16) for classifying patient samples. Performance on the controls  
74 is summarized.

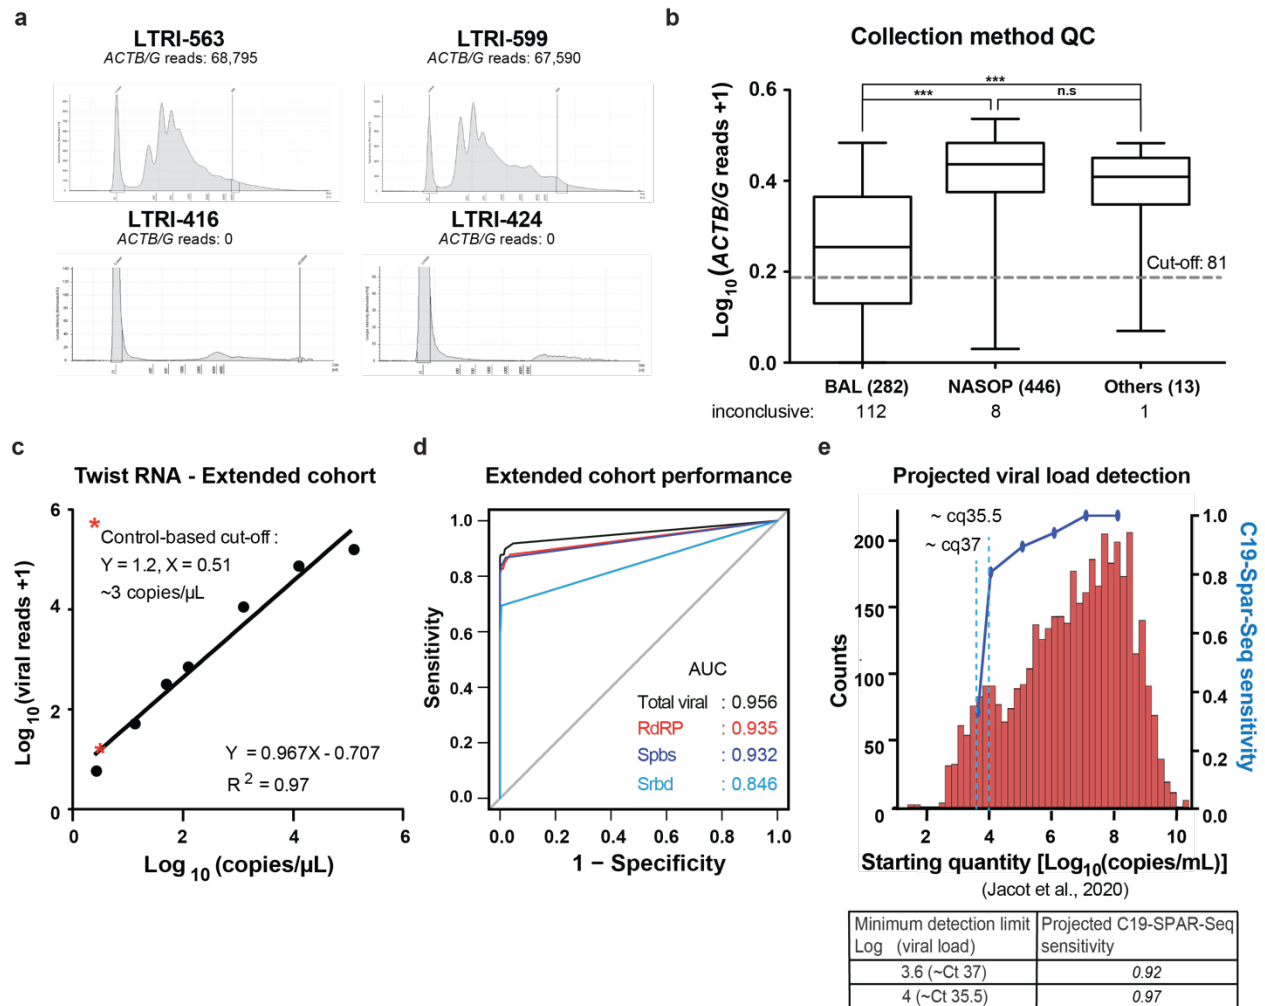

**Extended data Fig. 6**

**Extended data Fig. 6: C19-SPAR-Seq performance.** **a**, RNA profile of BALs. RNA purified from ten BALs above and 10 below the QC threshold was profiled and two representative traces of each group are shown. ACTB/G reads are indicated for each sample. **b**, ACTB/G reads according to collection type. ACTB/G reads are plotted for each

80 collection type as a box and whisker (median  $\pm$  95% confidence interval, and the  
81 maximum and minimum values). The number of samples filtered by coPR (ACTB/G reads  
82  $< 81$ ) are indicated for each group. 1way ANOVA - Tukey's multiple comparison test (\*\*\*\*:  
83  $p < 0.0001$ , ns: non significative) **c**, Standard curve of total viral reads plotted against  
84 synthetic SARS-CoV-2 RNA concentrations obtained from C19-SPAR-Seq analysis of  
85 the extended cohort. **d**, ROC curve analysis was performed for each of the indicated viral  
86 amplicons and the AUC is shown. **e**, Projection of our C19-SPAR-Seq sensitivity onto the  
87 viral load data of ~4,000 patients from Jacot *et al.*, 2020 study<sup>19</sup>. Minimum detection limit  
88 and C19-SPAR-Seq sensitivity values are indicated in the table below.
