# Supplementary material for: A Multiplexed, Next Generation Sequencing Platform for High-Throughput Detection of SARS-CoV-2
Source: Research Square preprint supplement (doi:10.21203/rs.3.rs-89445/v1), 2020-10-14
Supplement: Supplementary file 2 [file 991fe942821472b57abdf611.pdf]

# **A Multiplexed, Next Generation Sequencing Platform for High-Throughput**

## **Detection of SARS-CoV-2**

Marie-Ming Aynaud<sup>1\*\*</sup>, J. Javier Hernandez<sup>1,3\*\*</sup>, Seda Barutcu<sup>1\*\*</sup>, Ulrich Braunschweig<sup>3,4</sup>, Kin Chan<sup>1</sup>, Joel D. Pearson<sup>1</sup>, Daniel Trcka<sup>1</sup>, Suzanna L. Prosser<sup>1</sup>, Jaeyoun Kim<sup>1</sup>, Miriam Barrios-Rodiles<sup>1</sup>, Mark Jen<sup>1</sup>, Siyuan Song<sup>4,5</sup>, Jess Shen<sup>1</sup>, Christine Bruce<sup>2</sup>, Bryn Hazlett<sup>2</sup>, Susan Poutanen<sup>2</sup>, Liliana Attisano<sup>4,5</sup>, Rod Bremner<sup>1</sup>, Benjamin J. Blencowe<sup>3,4</sup>, Tony Mazzulli<sup>2</sup>, Hong Han<sup>3,4</sup>, Laurence Pelletier<sup>1,3\*</sup>, Jeffrey L. Wrana<sup>1,3\*</sup>.

## **Supplementary information**

**Supplementary Table 1: List of SARS-CoV-2 and human primers.** Primer sequences, name of the targeted regions, size of amplicons after multiplex and barcode PCR are indicated.

## **Supplementary Table 2: Itemized cost of C19-SPAR-Sseq per sample**

**Supplementary Table 3: Description of the proof-of-concept cohort for C19-SPAR-Seq detection of SARS-CoV-2.** Barcodes ID, sample identification (ID), date of retrieval, collection method, diagnostic laboratory status, and 'BGI' qRT-PCR results are indicated. These patient samples were used to develop C19-SPAR-Seq detection of SARS-CoV-2 (PoC cohort) (**Fig. 1**).

**Supplementary Table 4: Description of test development cohort.** Barcodes ID, sample identification (ID), date of retrieval, collection method, diagnostic laboratory qRT-

PCR results ('Seegene') are indicated (n = 112). These patient samples were used to establish SARS-CoV-2 clinical status assignment using diagnostic laboratory qRT-PCR results ('Seegene') and to test C19-SPAR-Seq detection of SARS-CoV-2 (**Fig. 2,3**).

**Supplementary Table 5: Confusion matrix of the test development cohort.**

**Supplementary Table 6: Description of the pilot cohort.** Barcodes ID, sample identification (ID), date of retrieval, collection method, diagnostic laboratory qRT-PCR results ('Seegene'), 'BGI' qRT-PCR results are indicated. Filtered archival samples are indicated. (Extended data **Fig. 3,4**).

**Supplementary Table 7: Description of the extended cohort.** Barcodes ID, sample identification (ID), date of retrieval, collection method, diagnostic laboratory qRT-PCR results ('Seegene'), and 'BGI' qRT-PCR results are indicated (**Fig. 4**).

**Supplementary Table 8: Confusion matrix of the extended cohort.**

**Supplementary Table 9: Group classifications**
